# Supplementary material
Source: PubMed Central journal article supplement (PMC1794068)

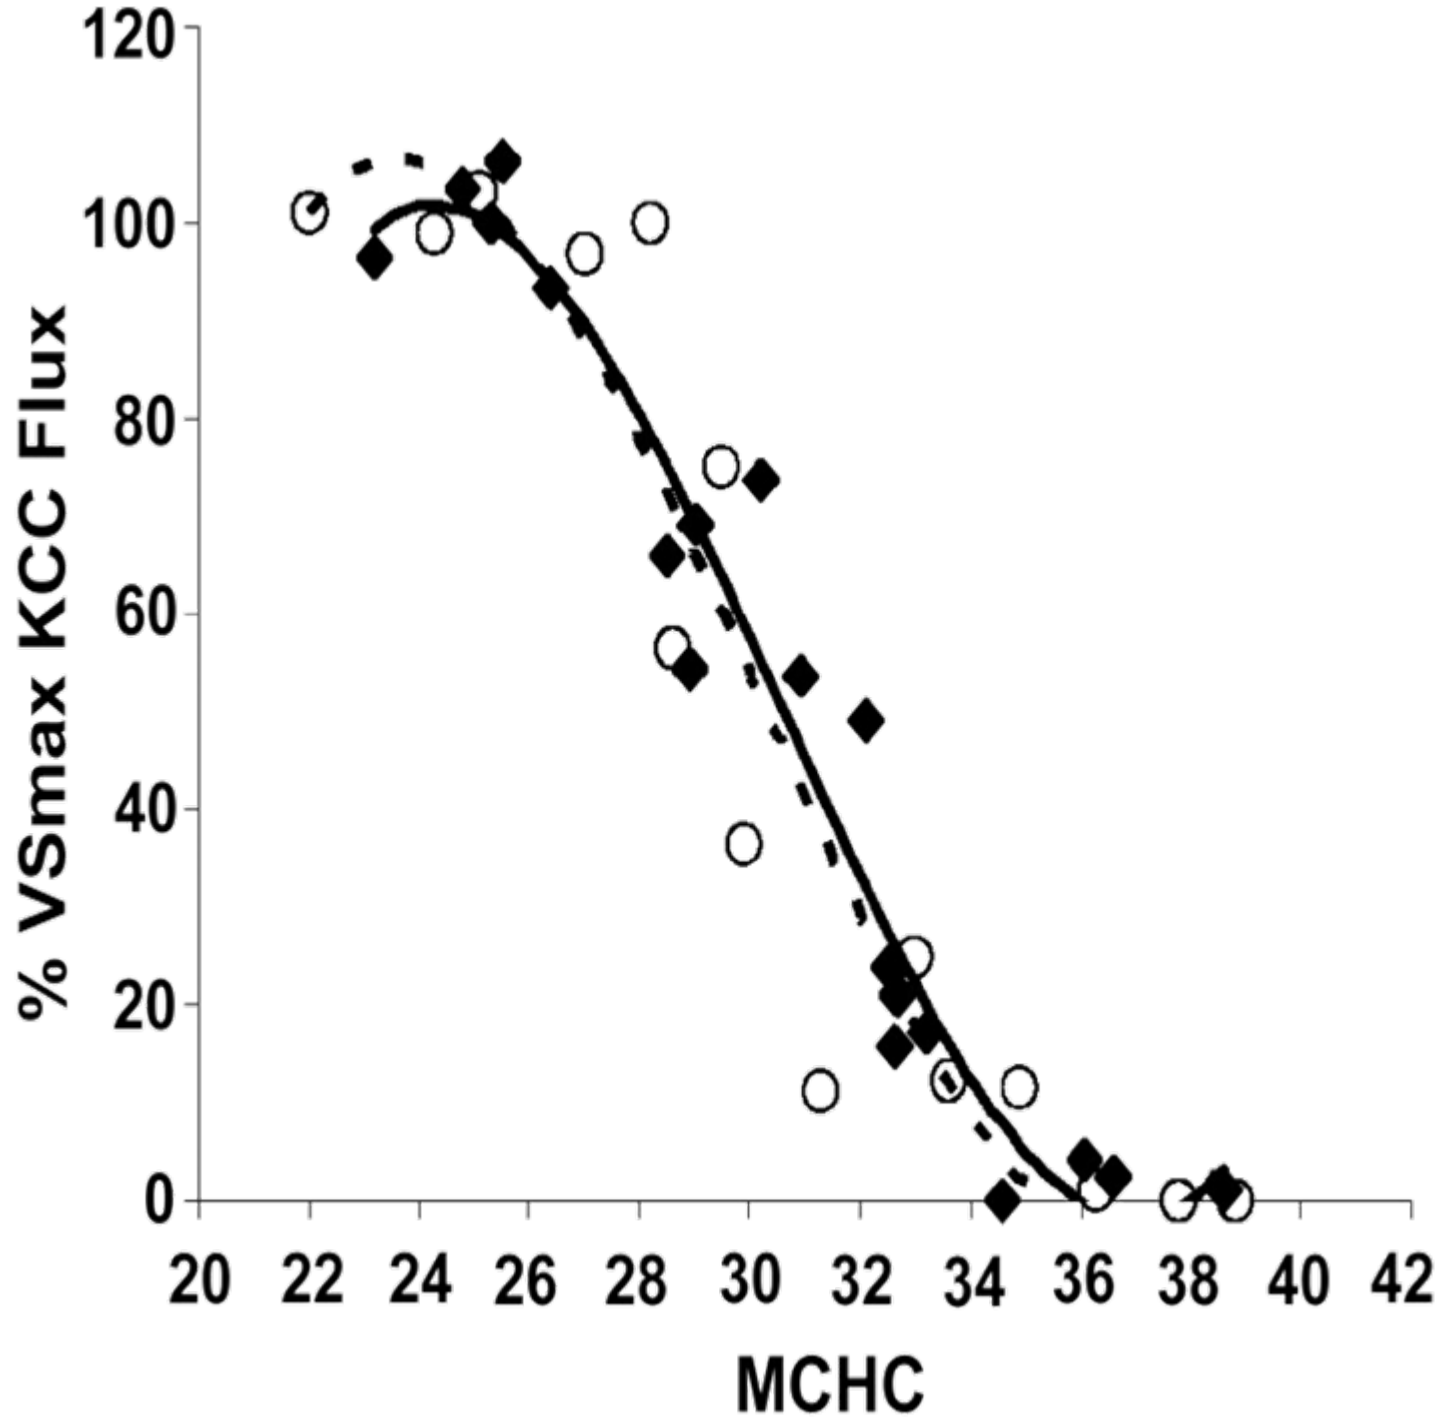

Supplement: blood_blood-2006-04-018630_2.pdf [file blood_blood-2006-04-018630_2.pdf]

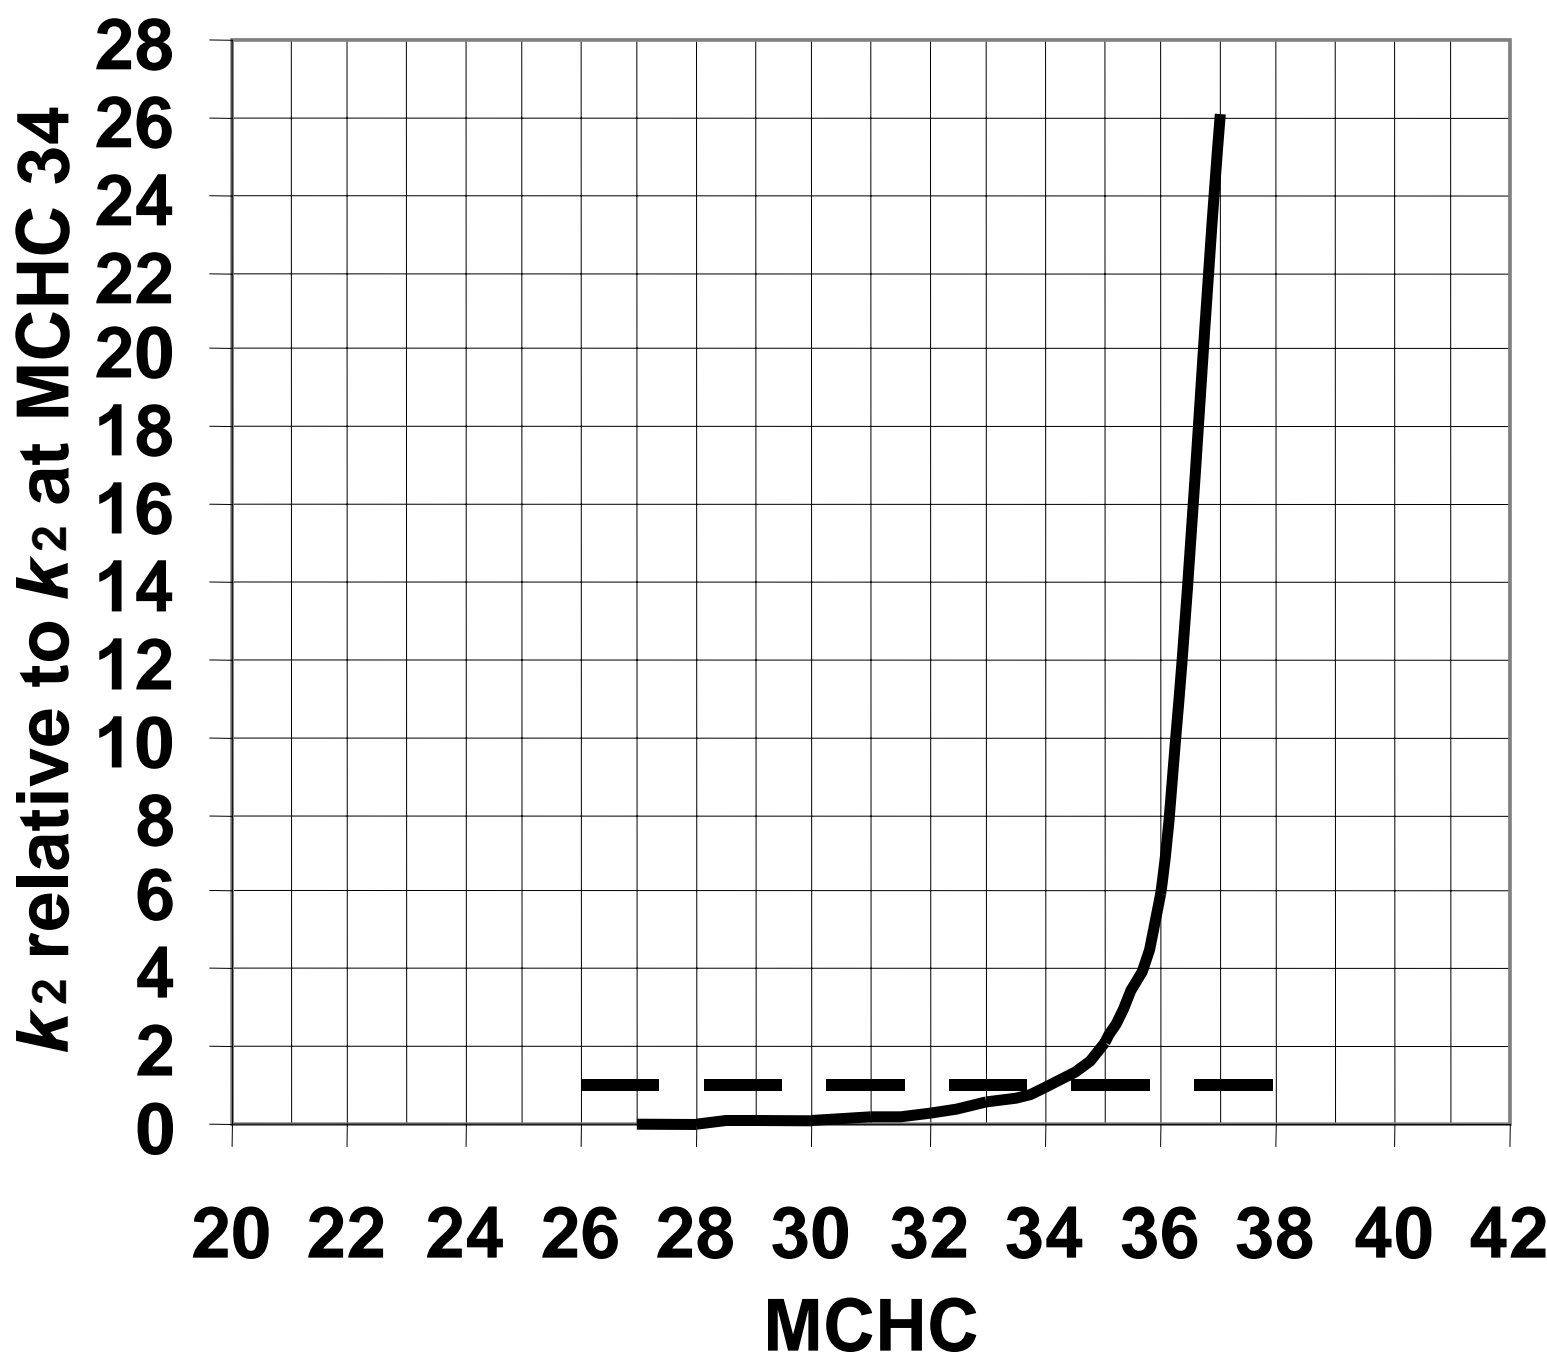

Supplement: blood_blood-2006-04-018630_3.pdf [file blood_blood-2006-04-018630_3.pdf]
